# Supplementary figures and images for: On a Measure of Tail Asymmetry for the Bivariate Skew-Normal Copula
Source: Preprints.org preprint supplement (doi:10.20944/preprints202306.1657.v1), 2023-06-23

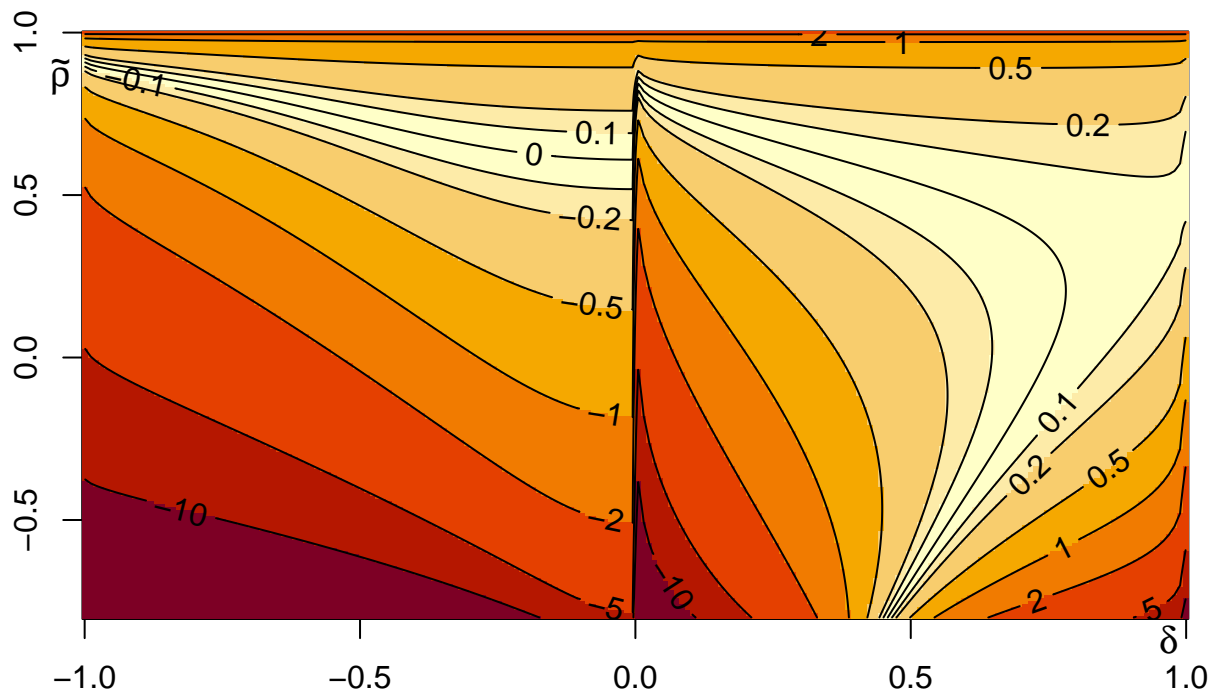

Supplement: Supplementary file 1 [file supplementary]

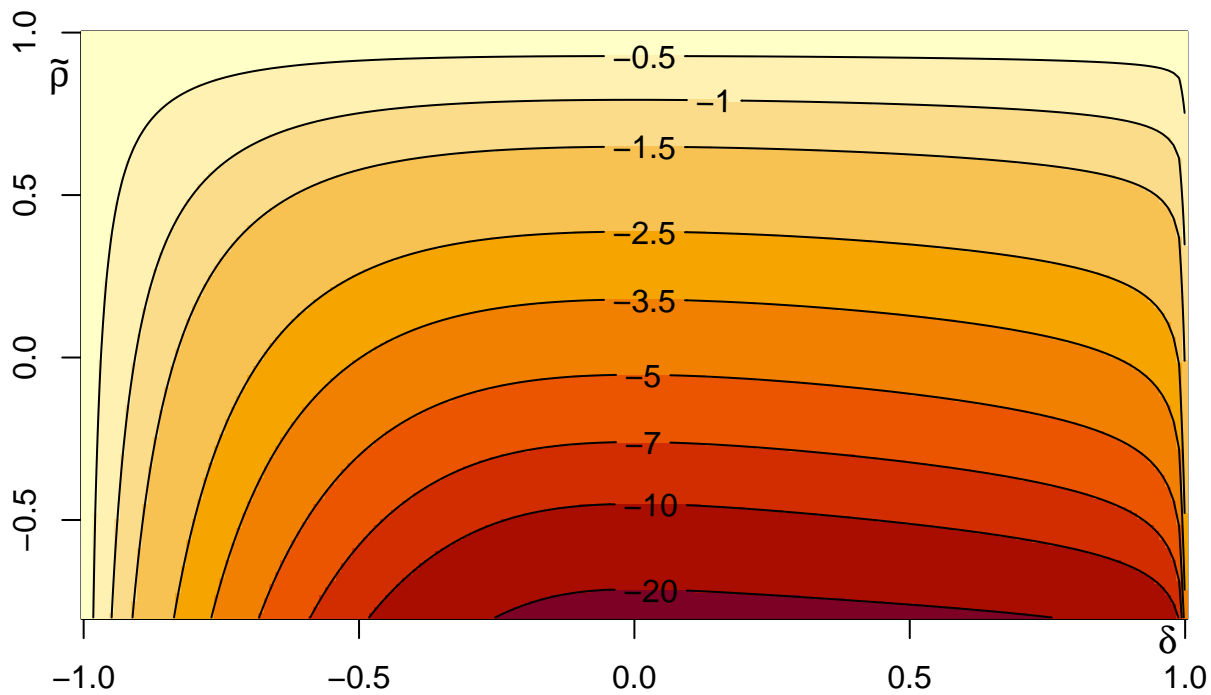

Supplement: Supplementary file 2 [file supplementary]

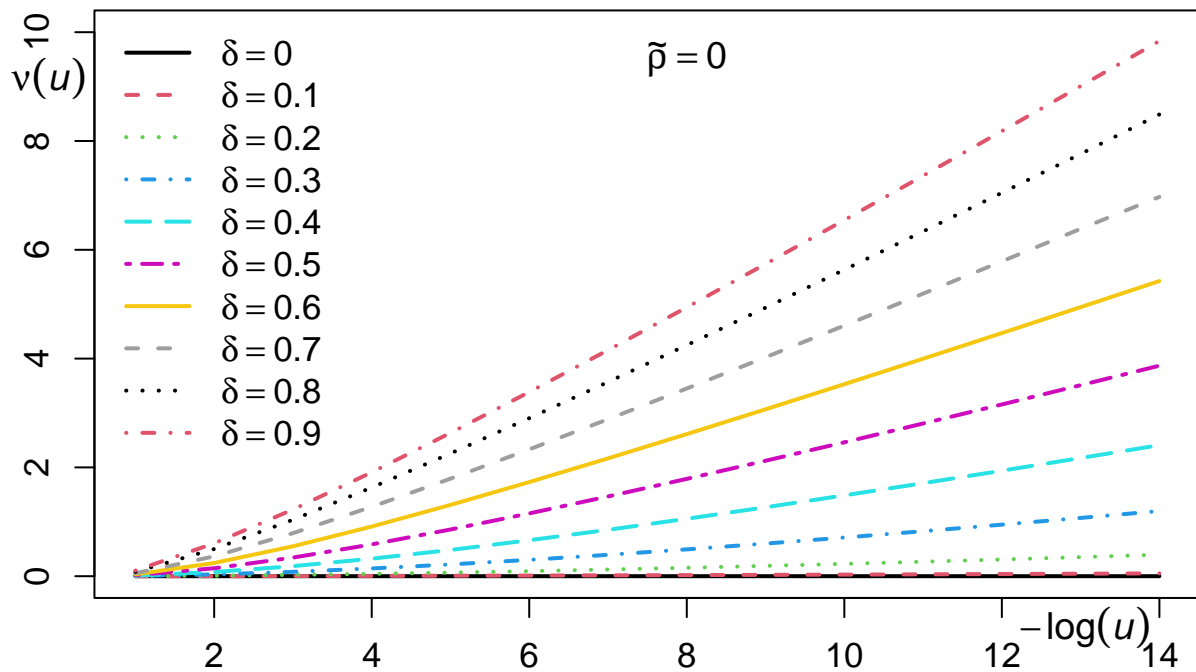

Supplement: Supplementary file 3 [file supplementary]

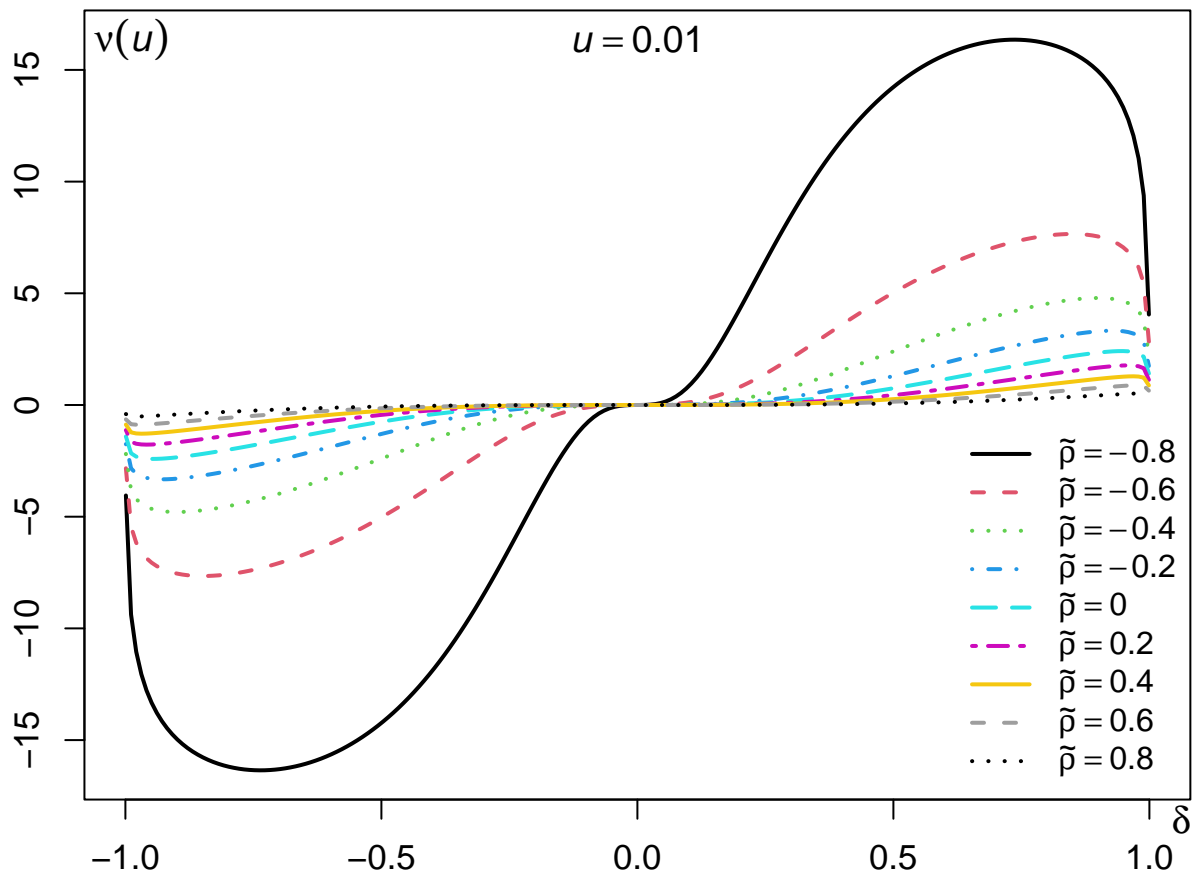

Supplement: Supplementary file 4 [file supplementary]

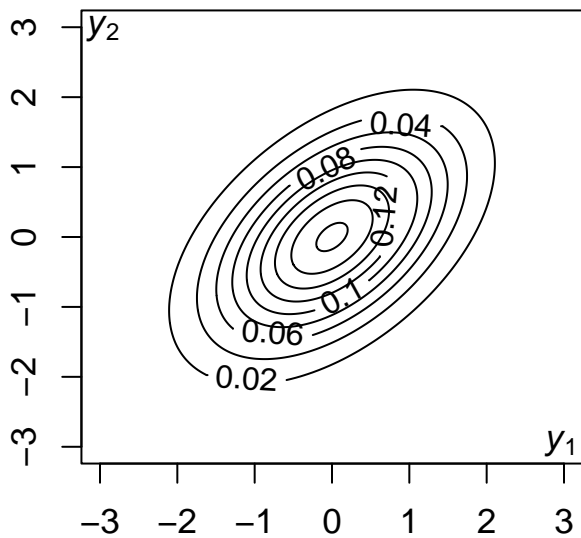

Supplement: Supplementary file 5 [file supplementary]

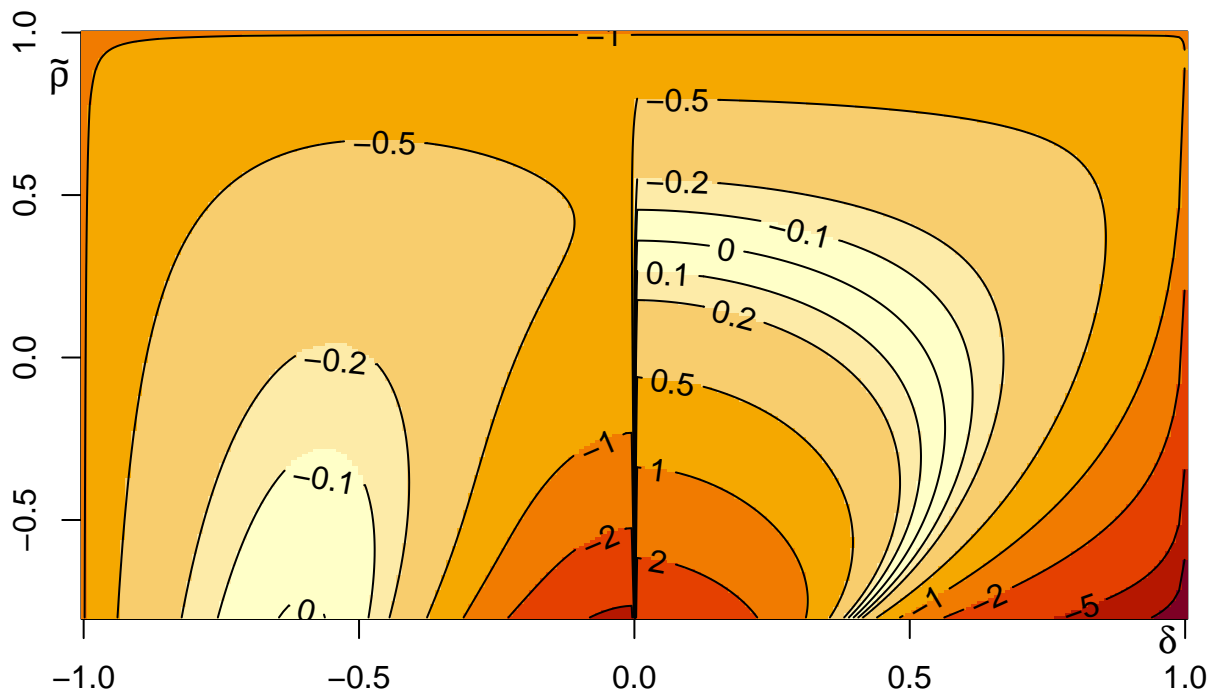

Supplement: Supplementary file 6 [file supplementary]

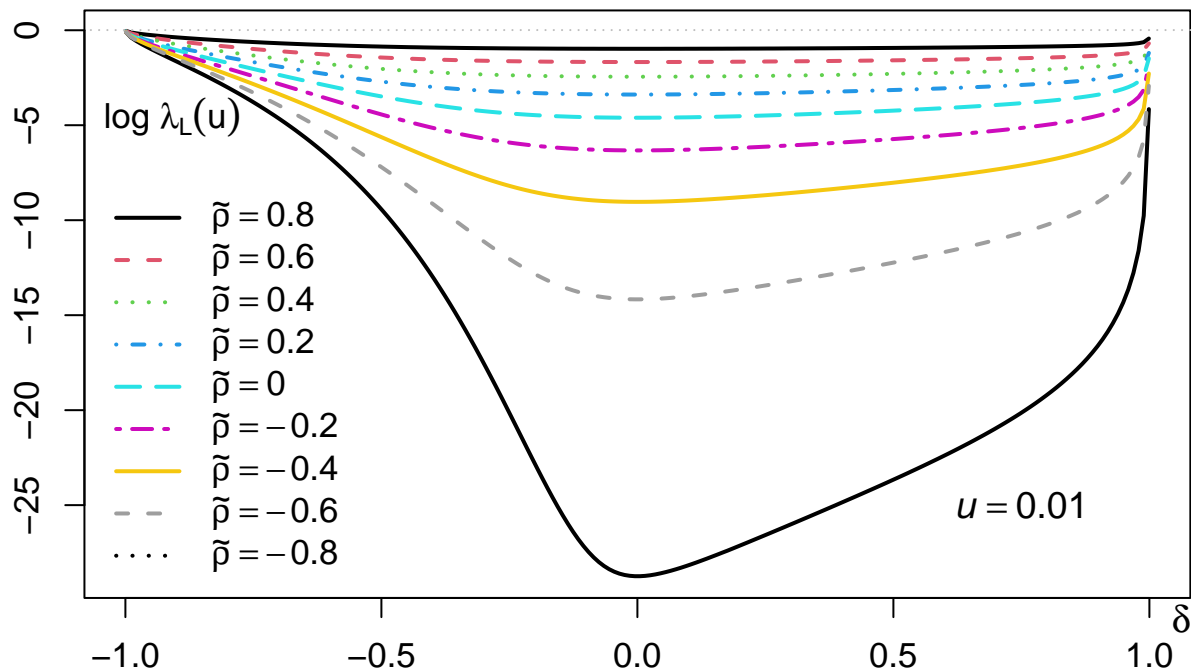

Supplement: Supplementary file 7 [file supplementary]
